# Supplementary material for: Transcriptome Profiles Reveal the Growth-Promoting Mechanisms of Paenibacillus polymyxa YC0136 on Tobacco (Nicotiana tabacum L.)
Source: Front Microbiol. 2020 Sep 25;11:584174. doi: 10.3389/fmicb.2020.584174 (PMC7546199; doi:10.3389/fmicb.2020.584174)
Supplement: Supplementary file 5 [file Table_5.XLSX]

## Sheet: Sheet1
gene_id	log2(FC)	name	Definition
gene9801	7.88	RGL4, rhiE	rhamnogalacturonan endolyase
gene66000	6.8		galacturan 1,4-alpha-galacturonidase
gene1858	5.26		galacturan 1,4-alpha-galacturonidase
gene27593	5.14	UGAT	cyanidin-3-O-glucoside 2'-O-glucuronosyltransferase
gene47222	4.54	UGAT	cyanidin-3-O-glucoside 2'-O-glucuronosyltransferase
gene23618	4.35		beta-glucosidase
gene38396	4.24	INV, sacA	beta-fructofuranosidase
gene27974	4.2	INV, sacA	beta-fructofuranosidase
gene10777	4.11	RGL4, rhiE	rhamnogalacturonan endolyase
gene1859	3.56		galacturan 1,4-alpha-galacturonidase
gene56330	3.4	CYP81F	indol-3-yl-methylglucosinolate hydroxylase
gene38528	3.25	TPS	trehalose 6-phosphate synthase/phosphatase
gene47810	3.24	ALDO	fructose-bisphosphate aldolase, class I
gene71192	3.15	scrK	fructokinase
gene42810	3.09	ALDO	fructose-bisphosphate aldolase, class I
gene61398	3.08		endo-polygalacturonase
gene2484	3.04	otsB	trehalose 6-phosphate phosphatase
gene49798	2.99		galacturan 1,4-alpha-galacturonidase
gene21528	2.91	RUMI, KTELC1	protein glucosyltransferase
gene28445	2.73	CISZOG
gene12429	2.7	SLC50A, SWEET	solute carrier family 50 (sugar transporter)
gene21575	2.56	otsB
gene57796	2.56	CISZOG
gene35222	2.47	UGT73C	UDP-glucosyl transferase 73C
gene8852	2.36	otsB
gene65383	2.35	xylA	xylose isomerase
gene61288	2.22		L-arabinokinase
gene45517	2.18		xyloglucan:xyloglucosyl transferase
gene1673	2.12		endoglucanase
gene24670	2.12	CISZOG
gene35138	2.07	INV, sacA	beta-fructofuranosidase
gene12886	2.06		xyloglucan:xyloglucosyl transferase
gene2157	2	INV, sacA	beta-fructofuranosidase
gene66868	2	TPS	trehalose 6-phosphate synthase/phosphatase
gene11213	1.94	UGT74B1	N-hydroxythioamide S-beta-glucosyltransferase
gene6875	1.93	FBP, fbp	fructose-1,6-bisphosphatase I
gene42218	1.93	SFRS1, ASF, SF2	splicing factor, arginine/serine-rich 1
gene40135	1.87		sucrose synthase
gene51295	1.85	galM, GALM
gene66187	1.85	INV, sacA	beta-fructofuranosidase
gene38871	1.82	otsB
gene67412	1.81	MAN	mannan endo-1,4-beta-mannosidase
gene19142	1.8	INV, sacA	beta-fructofuranosidase
gene2785	1.78	otsB
gene13919	1.78	UGAT	cyanidin-3-O-glucoside 2''-O-glucuronosyltransferase
gene53898	1.78	UGT75C1	anthocyanidin 3-O-glucoside 5-O-glucosyltransferase
gene43310	1.77	PGD, gnd, gntZ	6-phosphogluconate dehydrogenase
gene56390	1.77	CISZOG
gene20467	1.76	CISZOG
gene11568	1.76	MAN	mannan endo-1,4-beta-mannosidase
gene16307	1.74	pfkA, PFK	6-phosphofructokinase 1
gene43826	1.72	pfp, PFP
gene72840	1.71	bglB	beta-glucosidase
gene35221	1.7	UGT73C	UDP-glucosyl transferase 73C
gene51332	1.67	CISZOG
gene18379	1.66		L-arabinokinase
gene44731	1.65	UGT73C	UDP-glucosyl transferase 73C
gene59567	1.64	otsB
gene27728	1.63	xylA	xylose isomerase
gene44390	1.61	PGD, gnd, gntZ	6-phosphogluconate dehydrogenase
gene57792	1.6		hydroquinone glucosyltransferase
gene28343	1.6	SLC2A8, GLUT8	MFS transporter, SP family, solute carrier family 2 (facilitated glucose transporter), member 8
gene49414	1.59	SLC2A8, GLUT8	MFS transporter, SP family, solute carrier family 2 (facilitated glucose transporter), member 8
gene13590	1.58	UXS1, uxs	UDP-glucuronate decarboxylase
gene60673	1.58	pfkA, PFK	6-phosphofructokinase 1
gene45809	1.57	XYL4	xylan 1,4-beta-xylosidase
gene71185	1.54	INV, sacA	beta-fructofuranosidase
gene63573	1.53	VRG4, GONST1	GDP-mannose transporter
gene65600	1.52	TCH4	xyloglucan:xyloglucosyl transferase TCH4
gene37833	1.5		raffinose synthase
gene56821	1.5		xyloglucan:xyloglucosyl transferase
gene54870	-1.5	CSLA	beta-mannan synthase
gene16725	-1.5	RGL4, rhiE	rhamnogalacturonan endolyase
gene65944	-1.52	UGDH, ugd
gene51315	-1.54	CISZOG
gene68241	-1.56	galE, GALE
gene65601	-1.56		xyloglucan:xyloglucosyl transferase
gene4719	-1.59		xyloglucan:xyloglucosyl transferase
gene1302	-1.61		xyloglucan:xyloglucosyl transferase
gene68455	-1.61	galE, GALE
gene1912	-1.61	SLC50A, SWEET	solute carrier family 50 (sugar transporter)
gene53964	-1.62	scrK	fructokinase
gene67152	-1.63		xyloglucan:xyloglucosyl transferase
gene42484	-1.63	otsB
gene50	-1.64	CISZOG
gene36025	-1.64		1,4-beta-D-xylan synthase
gene66031	-1.64	GXM
gene67272	-1.64		sucrose-phosphate synthase
gene37792	-1.66	HGSNAT	heparan-alpha-glucosaminide N-acetyltransferase
gene43927	-1.67		xyloglucan:xyloglucosyl transferase
gene45276	-1.69	VRG4, GONST1	GDP-mannose transporter
gene22858	-1.69	XGD1
gene60241	-1.7		beta-glucosidase
gene41305	-1.72	CSLA	beta-mannan synthase
gene5856	-1.72		endoglucanase
gene43855	-1.73	UGP2, galU, galF	UTP--glucose-1-phosphate uridylyltransferase
gene36489	-1.73
gene9414	-1.73	XYL4	xylan 1,4-beta-xylosidase
gene55017	-1.74	FBP, fbp	fructose-1,6-bisphosphatase I
gene73854	-1.74	GBE1, glgB	1,4-alpha-glucan branching enzyme
gene57840	-1.77		beta-glucosidase
gene15297	-1.78		xyloglucan:xyloglucosyl transferase
gene28586	-1.79	XGD1
gene51602	-1.81	galM, GALM
gene50478	-1.88	galM, GALM
gene22357	-1.9	SLC50A, SWEET	solute carrier family 50 (sugar transporter)
gene46907	-1.92		xyloglucan:xyloglucosyl transferase
gene19466	-1.93	GYG1, GYG2	glycogenin
gene4258	-1.95	bglB	beta-glucosidase
gene72549	-1.95		endo-polygalacturonase
gene47323	-1.96	bglB	beta-glucosidase
gene66615	-1.96	GXM
gene50479	-1.96	galM, GALM
gene53518	-1.97	CISZOG
gene29945	-1.97	otsB
gene46906	-1.99		xyloglucan:xyloglucosyl transferase
gene22968	-2.01	glgC	glucose-1-phosphate adenylyltransferase
gene68033	-2.02	CISZOG
gene42893	-2.03		endoglucanase
gene27661	-2.07	SLC50A, SWEET	solute carrier family 50 (sugar transporter)
gene12745	-2.09		xyloglucan:xyloglucosyl transferase
gene41828	-2.1		endo-1,3(4)-beta-glucanase
gene27002	-2.1		xyloglucan:xyloglucosyl transferase
gene50096	-2.12		beta-glucosidase
gene19310	-2.15	GYG1, GYG2	glycogenin
gene41639	-2.15	CISZOG
gene64629	-2.2	rbcS	ribulose-bisphosphate carboxylase small chain
gene14158	-2.21	tag
gene49284	-2.23	RGP, UTM
gene59564	-2.26	tag
gene46810	-2.26	UGDH, ugd
gene25489	-2.29	ALDO	fructose-bisphosphate aldolase, class I
gene56116	-2.3	SLC50A, SWEET	solute carrier family 50 (sugar transporter)
gene38050	-2.35		endo-polygalacturonase
gene68938	-2.35		xyloglucan:xyloglucosyl transferase
gene24013	-2.37	VRG4, GONST1	GDP-mannose transporter
gene46348	-2.4		beta-glucosidase
gene57348	-2.42	tag
gene52624	-2.43	UGT73C	UDP-glucosyl transferase 73C
gene36048	-2.5		xyloglucan:xyloglucosyl transferase
gene48875	-2.53		xyloglucan:xyloglucosyl transferase
gene38048	-2.54		endo-polygalacturonase
gene31741	-2.55	UGT73C	UDP-glucosyl transferase 73C
gene68215	-2.56		endo-1,3(4)-beta-glucanase
gene13145	-2.57		endo-polygalacturonase
gene52224	-2.58		xyloglucan:xyloglucosyl transferase
gene36929	-2.58	tag
gene48349	-2.6	CISZOG
gene58270	-2.6		beta-glucosidase
gene43517	-2.63		endo-polygalacturonase
gene23610	-2.66		hydroquinone glucosyltransferase
gene26059	-2.69	SLC50A, SWEET	solute carrier family 50 (sugar transporter)
gene9485	-2.7		xyloglucan:xyloglucosyl transferase
gene5296	-2.7		xyloglucan:xyloglucosyl transferase
gene46908	-2.7		xyloglucan:xyloglucosyl transferase
gene35481	-2.72	XYLT	protein xylosyltransferase
gene37521	-2.72	SLC50A, SWEET	solute carrier family 50 (sugar transporter)
gene66061	-2.73	SLC50A, SWEET	solute carrier family 50 (sugar transporter)
gene53747	-2.82	CYP81F	indol-3-yl-methylglucosinolate hydroxylase
gene4378	-3.05		xyloglucan:xyloglucosyl transferase
gene41370	-3.07	XYLT	protein xylosyltransferase
gene34434	-3.13		beta-glucosidase
gene6400	-3.24	bglB	beta-glucosidase
gene14359	-3.24		beta-glucosidase
gene3738	-3.37		endo-polygalacturonase
gene24068	-3.42	CISZOG
gene60661	-3.43	tag
gene50245	-3.48		endo-polygalacturonase
gene55832	-3.53	ribH, RIB4	6,7-dimethyl-8-ribityllumazine synthase
gene4259	-3.59	bglB	beta-glucosidase
gene69420	-3.59		xyloglucan:xyloglucosyl transferase
gene34211	-3.67		endo-polygalacturonase
gene40229	-3.71		endo-polygalacturonase
gene26920	-3.74	RGP, UTM
gene73179	-3.88		xyloglucan:xyloglucosyl transferase
gene71281	-3.95		xyloglucan:xyloglucosyl transferase
gene40537	-4.07	RGP, UTM
gene16117	-4.09		endo-polygalacturonase
gene71658	-4.42		xyloglucan:xyloglucosyl transferase
gene4430	-4.44	RGP, UTM
gene69223	-4.44	INV, sacA	beta-fructofuranosidase
gene6072	-4.53	INV, sacA	beta-fructofuranosidase
gene53789	-4.54	INV, sacA	beta-fructofuranosidase
